# Supplementary material for: Bitter taste sensitivity, cruciferous vegetable intake, obesity, and diabetes in American adults: a cross-sectional study of NHANES 2013–2014
Source: Royal Society of Chemistry journal article supplement (doi:10.1039/d3fo02175k), 2023-01-01
Supplement: d3fo02175k1.xlsx [file d3fo02175k1.xlsx]

## Sheet: Sheet1
													1.286	0.763	2.167	0.523	0.881
																				minus	plus
not bitter sensitive ate bitter vegs				27.7386	0.4508	15	61.53	<.0001			43.8	3		26.8	4.1		1	1	1	0	0
bitter sensitive ate bitter vegs				28.9047	0.4341	15	66.59	<.0001			37.4	4.1		37	3.2		1.286	0.763	2.167	0.523	0.881
not bitter sensitive not ate bitter vegs				29.4921	0.3964	15	74.39	<.0001			37	3.2		37.4	4.1		1.404	0.902	2.184	0.502	0.78
bitter sensitive not ate bitter vegs				30.2724	0.3856	15	78.5	<.0001			26.8	4.1		43.8	3		1.677	1.054	2.669	0.623	0.992
		No	Yes	No	Yes	Bitter Taste Sensitivity			Yes	No	Yes	No
		Yes	Yes	No	No	Ate cruciferous vegetable			No	No	Yes	Yes
